# Supplementary material
Source: publisher site journal article supplement (https://www.dovepress.com/article/375125)
Supplement: Supplementary file 1 [file get_supplementary_file.php]

## DATA COLLECTION SHEET

**INTERVENTION DATE:** \_\_\_\_\_ **PHARMACIST:** \_\_\_\_\_

**NATIONAL MEDICATION CODE:** \_\_\_\_\_ **NAME (optional\*):** \_\_\_\_\_  
*If the antibiotic is not specified, record the code "000018"*

**Patient or caregiver?**      NO     YES     → ¿Do you have a prescription? Yes  No   
 Gender Male  Female  Foreign  Age: \_\_\_\_  
 (approximate, no question)

**The patient has a prescription**    Yes  (1)    No  (2)

**(1) WITH PRESCRIPTION**

**Start treatment?**    Yes  No  Prophylactic treatment

**Degree of knowledge**

|                                 |                                                          |                             |                                                          |
|---------------------------------|----------------------------------------------------------|-----------------------------|----------------------------------------------------------|
| Identifies the pathology        | Yes <input type="checkbox"/> No <input type="checkbox"/> | Knows the prescribed dosage | Yes <input type="checkbox"/> No <input type="checkbox"/> |
| Knows warnings, adverse effects | Yes <input type="checkbox"/> No <input type="checkbox"/> | Knows storage instructions  | Yes <input type="checkbox"/> No <input type="checkbox"/> |

**Contraindication or indication**    Has the disease ... Yes  No     Take the medicine ... Yes  No

**Problems related to medicines (PRM)?**    Yes  No

|               |                                     |                                         |
|---------------|-------------------------------------|-----------------------------------------|
| Kinf of PRM   | Efficacy <input type="checkbox"/>   | Security <input type="checkbox"/>       |
| PRM situation | Manifested <input type="checkbox"/> | Non manifested <input type="checkbox"/> |

**Description of relevant aspects of the case** (on the back of the page) → **End**

**In the event that the request is with a prescription and the intervention ends in dispensing, it is convenient to underline messages such as:** "Remember that this medicine is an antibiotic, finish the treatment, if you have any left over, bring it to the pharmacy to destroy it without contaminating it. Do not use again unless your doctor prescribes it".

**(2) WITHOUT PRESCRIPTION**

**Why does the patient demand the medicine?**

**Oral prescription  (a)**  
**To continue treatment  (b)**  
**Self-medication  (c)**

**Indications**

Ears  Sinusitis  Mouth  Throat  Flu, cold   
 UTI  Skin infection  Eyes  Respiratory inf   
 Prophylaxis  Others

**Prescribing physicians?**

|                                       |                                 |                                       |                                     |
|---------------------------------------|---------------------------------|---------------------------------------|-------------------------------------|
| Dentist <input type="checkbox"/>      | Doctor <input type="checkbox"/> | Pediatrician <input type="checkbox"/> | Veterinary <input type="checkbox"/> |
| Chiropracist <input type="checkbox"/> | Others <input type="checkbox"/> |                                       |                                     |

**Remember that without a prescription it cannot be dispensed** → **End**

**(c) Self-medication**

**Intervention**    Reject both alternatives and went to another pharmacy office   
 Accept referral to a doctor   
 Accept an alternative treatment   
 Dispensed drug code \_\_\_\_\_

**End** (Description of relevant aspects of the case (on the back of the page))
